# Supplementary material for: Cybersickness in Augmented Reality: Subjective and physiological changes with the course of prolonged exposure
Source: Research Square preprint supplement (doi:10.21203/rs.3.rs-7182892/v1), 2025-11-03
Supplement: Supplementary file 1 [file ab57ab08ee43a307d2d12aee.pdf]

# **Cybersickness in Augmented Reality: Subjective and physiological changes with the course of prolonged exposure**

## ***Virtual Reality***

Zion Park, Seyoon Song, Subin Jeon, Yuyeon Jung, Yeha Cha, Jiyoung Oh, Minsung Jin, Chai-Youn Kim<sup>+</sup>

<sup>+</sup>Corresponding author

Chai-Youn Kim

School of Psychology, Korea University, 145 Anam-ro, Seongbuk-gu, Seoul, Republic of Korea

[chaikim@korea.ac.kr](mailto:chaikim@korea.ac.kr) / <https://orcid.org/0000-0002-9867-1309>

## **1 Supplementary Materials**

### **1.1 Videos**

Video recordings of a first-person simulation racing game, *Forza Horizon 5* (Playground Games 2021). Video S1 and Video S2 are samples of each movement speed stimulus (S1: slow, S2: fast), including a gradual change of color to black-and-white.

## 1.2 Tables

| SSQ symptoms <sup>a</sup> | Weight     |            |            |             |
|---------------------------|------------|------------|------------|-------------|
|                           | N          | O          | D          |             |
| General discomfort        | 1          | 1          |            |             |
| Fatigue                   |            | 1          |            |             |
| Headache                  |            | 1          |            |             |
| Eye strain                |            | 1          |            |             |
| Difficulty focusing       |            | 1          | 1          |             |
| Increased salivation      | 1          |            |            |             |
| Sweating                  | 1          |            |            |             |
| Nausea                    | 1          |            | 1          |             |
| Difficulty concentrating  | 1          | 1          |            |             |
| Fullness of head          |            |            | 1          |             |
| Blurred vision            |            | 1          | 1          |             |
| Dizzy (eye open)          |            |            | 1          |             |
| Dizzy (eye closed)        |            |            | 1          |             |
| Vertigo                   |            |            | 1          |             |
| Stomach awareness         | 1          |            |            |             |
| Burping                   | 1          |            |            |             |
| Total <sup>b</sup>        | [1]        | [2]        | [3]        |             |
| [1] + [2] + [3] = [4]     |            |            |            |             |
| Score                     | TS         | N          | O          | D           |
|                           | [4] x 3.74 | [1] x 9.54 | [2] x 7.58 | [3] x 13.92 |

**Table S1** Computation of SSQ scores from Kennedy et al. (1993). <sup>a</sup>Scored 0, 1, 2, 3. <sup>b</sup>Sum obtained by adding symptom scores

| Post-hoc comparisons |                 | Mean Diff. | SE    | t      | Cohen's d | pbonf   |
|----------------------|-----------------|------------|-------|--------|-----------|---------|
| N, Pre-test          | N, Block 1      | -6.439     | 2.859 | -2.252 | -0.214    | 1       |
|                      | N, Block 2      | -13.833    | 4.064 | -3.404 | -0.46     | 0.456   |
|                      | N, Block 3      | -18.126    | 4.467 | -4.058 | -0.603    | 0.103   |
|                      | N, Post-test    | -10.971    | 3.285 | -3.34  | -0.365    | 0.526   |
|                      | N, Post-removal | -6.678     | 3.57  | -1.871 | -0.222    | 1       |
| N, Block1            | N, Block 2      | -7.394     | 1.91  | -3.87  | -0.246    | 0.158   |
|                      | N, Block 3      | -11.687    | 2.926 | -3.995 | -0.389    | 0.119   |
|                      | N, Post-test    | -4.532     | 2.409 | -1.881 | -0.151    | 1       |
|                      | N, Post-removal | -0.238     | 3.066 | -0.078 | -0.008    | 1       |
| N, Block2            | N, Block 3      | -4.293     | 1.985 | -2.163 | -0.143    | 1       |
|                      | N, Post-test    | 2.862      | 2.382 | 1.201  | 0.095     | 1       |
|                      | N, Post-removal | 7.155      | 2.987 | 2.395  | 0.238     | 1       |
| N, Block3            | N, Post-test    | 7.155      | 2.119 | 3.376  | 0.238     | 0.485   |
|                      | N, Post-removal | 11.448     | 2.599 | 4.405  | 0.381     | 0.047*  |
| N, Post-test         | N, Post-removal | 4.293      | 2.42  | 1.774  | 0.143     | 1       |
| O, Pre-test          | O, Block 1      | -16.108    | 3.667 | -4.392 | -0.536    | 0.048*  |
|                      | O, Block 2      | -24.066    | 4.796 | -5.018 | -0.801    | 0.012*  |
|                      | O, Block 3      | -31.836    | 5.474 | -5.816 | -1.059    | 0.002** |
|                      | O, Post-test    | -19.518    | 5.124 | -3.809 | -0.649    | 0.181   |
|                      | O, Post-removal | -14.212    | 4.132 | -3.439 | -0.473    | 0.421   |
| O, Block1            | O, Block 2      | -7.959     | 1.942 | -4.098 | -0.265    | 0.094   |
|                      | O, Block 3      | -15.728    | 3.138 | -5.012 | -0.523    | 0.012*  |
|                      | O, Post-test    | -3.411     | 4.002 | -0.852 | -0.113    | 1       |
|                      | O, Post-removal | 1.895      | 4.273 | 0.443  | 0.063     | 1       |

|              |                 |         |       |        |        |       |
|--------------|-----------------|---------|-------|--------|--------|-------|
| O, Block2    | O, Block 3      | -7.769  | 2.084 | -3.727 | -0.258 | 0.219 |
|              | O, Post-test    | 4.548   | 3.56  | 1.278  | 0.151  | 1     |
|              | O, Post-removal | 9.854   | 4.245 | 2.321  | 0.328  | 1     |
| O, Block3    | O, Post-test    | 12.317  | 3.048 | 4.041  | 0.41   | 0.107 |
|              | O, Post-removal | 17.623  | 4.554 | 3.87   | 0.586  | 0.158 |
| O, Post-test | O, Post-removal | 5.306   | 3.96  | 1.34   | 0.177  | 1     |
| <hr/>        |                 |         |       |        |        |       |
| D, Pre-test  | D, Block 1      | -12.528 | 6.517 | -1.922 | -0.417 | 1     |
|              | D, Block 2      | -19.488 | 7.767 | -2.509 | -0.648 | 1     |
|              | D, Block 3      | -28.536 | 8.387 | -3.402 | -0.949 | 0.457 |
|              | D, Post-test    | -16.008 | 6.309 | -2.537 | -0.533 | 1     |
|              | D, Post-removal | -3.828  | 4.209 | -0.91  | -0.127 | 1     |
| D, Block1    | D, Block 2      | -6.96   | 2.368 | -2.939 | -0.232 | 1     |
|              | D, Block 3      | -16.008 | 4.376 | -3.658 | -0.533 | 0.256 |
|              | D, Post-test    | -3.48   | 4.445 | -0.783 | -0.116 | 1     |
|              | D, Post-removal | 8.7     | 5.642 | 1.542  | 0.289  | 1     |
| D, Block2    | D, Block 3      | -9.048  | 3.465 | -2.611 | -0.301 | 1     |
|              | D, Post-test    | 3.48    | 4.908 | 0.709  | 0.116  | 1     |
|              | D, Post-removal | 15.66   | 6.62  | 2.366  | 0.521  | 1     |
| D, Block3    | D, Post-test    | 12.528  | 3.865 | 3.241  | 0.417  | 0.658 |
|              | D, Post-removal | 24.708  | 7.185 | 3.439  | 0.822  | 0.421 |
| D, Post-test | D, Post-removal | 12.18   | 5.096 | 2.39   | 0.405  | 1     |

**Table S2** Post-hoc comparisons between SSQ subscale scores and exposure duration. Asterisks indicate statistical significance (\*  $p < .05$ , \*\*  $p < .01$ )

### 1.3 Figures

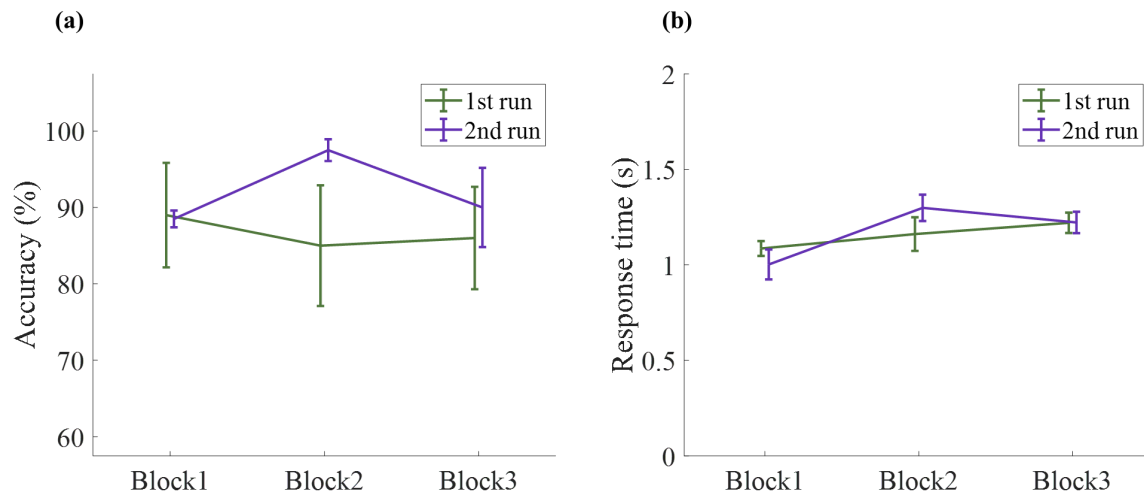

**Figure S1** Behavioral performances across blocks for the first experimental run (green) and the second (violet). Error bars indicate standard errors; (a) accuracy rate, (b) response time

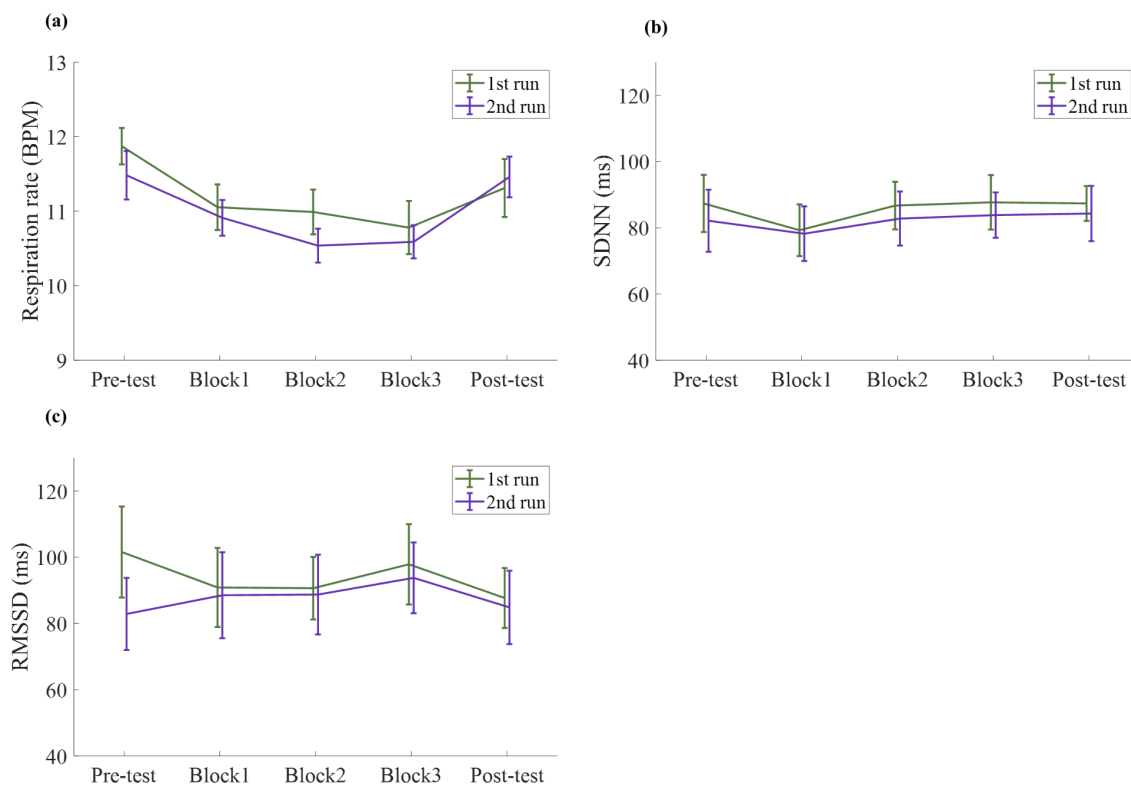

**Figure S2** Physiological results across blocks for the first experimental run (green) and the second (violet). Error bars indicate standard errors; (a) respiration rate, (b) SDNN, (c) RMSSD

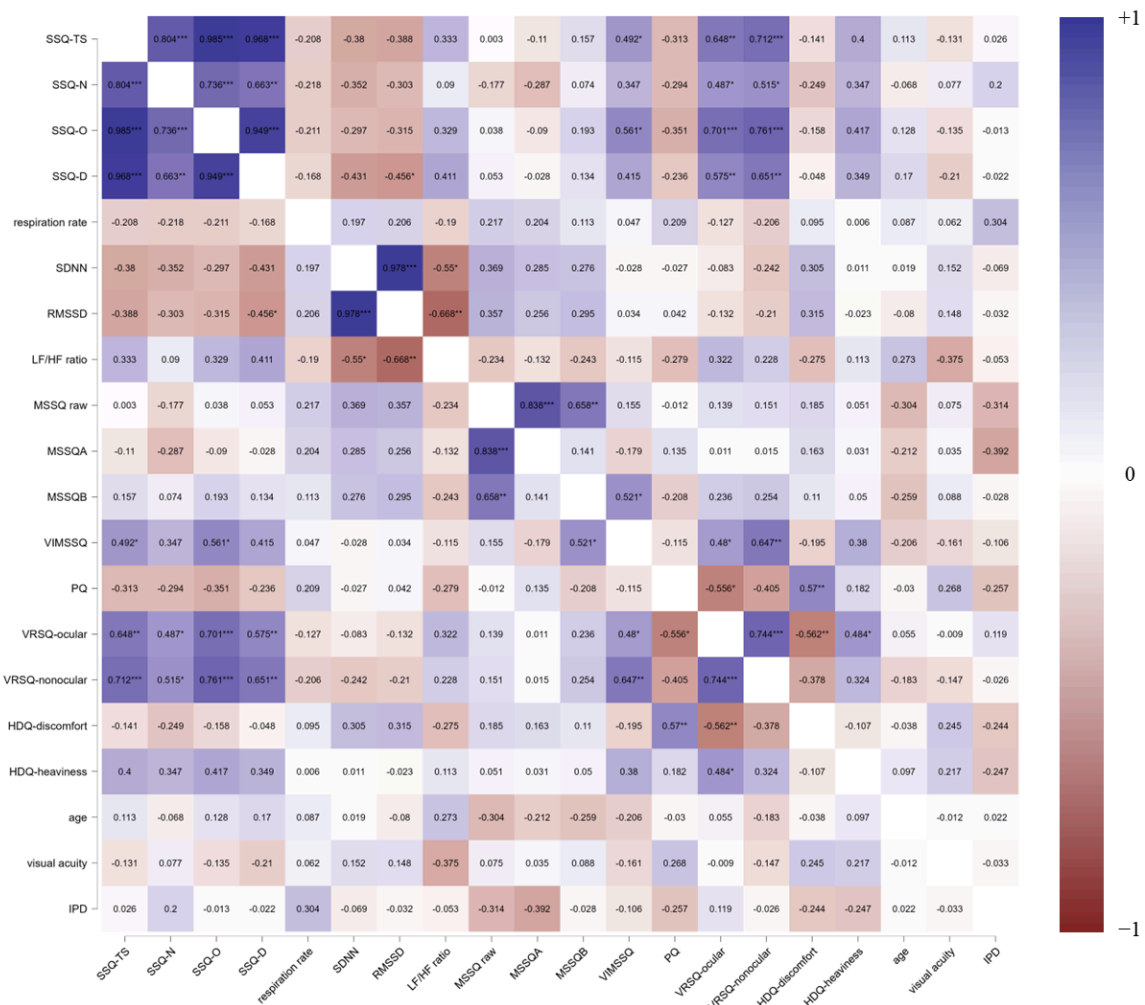

**Figure S3** Heat-maps for results of correlation analyses. Each cell contains a value of Pearson's r.

Asterisks indicate statistical significance (\* p < .05, \*\* p < .01, \*\*\* p < .001)

## 1.4 Spreadsheets

**Spreadsheets S1** The statistical results of repeated measures ANOVAs with exposure duration and movement speed as within-subject factors. Sheet 1 contains the main results, while Sheet 2 contains the results of post-hoc comparisons

**Spreadsheets S2** The statistical results of mixed ANOVAs with exposure duration and movement speed as within-subject factors, and group as a between-subject factor. Sheet 1 contains the main results, while Sheet 2 contains the results of post-hoc comparisons
