# Supplementary material for: Cybersickness in Augmented Reality: Subjective and physiological changes with the course of prolonged exposure
Source: Research Square preprint supplement (doi:10.21203/rs.3.rs-7182892/v1), 2025-11-03
Supplement: Supplementary file 1 [file Spreadsheets_S1.xlsx]

## Sheet: Sheet1
	Accuracy
	Within Subjects Effects
	Cases		Sum of Squares		df		Mean Square		F		p		η²p
	movement speed		653.333		1		653.333		0.867		0.363		0.044
	Residuals		14313.3		19		753.333
	exposure duration		231.667		2		115.833		0.242		0.786		0.013
	Residuals		18168.3		38		478.114
	movement speed ✻ exposure duration		221.667		2		110.833		0.203		0.817		0.011
	Residuals		20711.7		38		545.044
	Note. Type III Sum of Squares
	Between Subjects Effects
	Cases		Sum of Squares		df		Mean Square		F		p		η²p
	Residuals		17646.7		19		928.772
	Note. Type III Sum of Squares
	Response time
	Within Subjects Effects
	Cases		Sum of Squares		df		Mean Square		F		p		η²p
	movement speed		0.069		1		0.069		0.583		0.458		0.04
	Residuals		1.663		14		0.119
	exposure duration		0.529		2		0.265		7.305		0.003		0.343
	Residuals		1.015		28		0.036
	movement speed ✻ exposure duration		0.13		2		0.065		1.482		0.244		0.096
	Residuals		1.226		28		0.044
	Note. Type III Sum of Squares
	Between Subjects Effects
	Cases		Sum of Squares		df		Mean Square		F		p		η²p
	Residuals		1.74		14		0.124
	Note. Type III Sum of Squares
	SSQ-TS
	Within Subjects Effects
	Cases		Sphericity Correction		Sum of Squares		df		Mean Square		F		p		η²p
	movement speed		None		2669.07		1		2669.07		2.142		0.16		0.101
	Residuals		None		23671.9		19		1245.89
	exposure duration		None		21862.4	ᵃ	5	ᵃ	4372.48	ᵃ	12.084	ᵃ	< .001	ᵃ	0.389
			Greenhouse-Geisser		21862.4		2.541		8602.52		12.084		< .001		0.389
	Residuals		None		34374.8		95		361.84
			Greenhouse-Geisser		34374.8		48.286		711.892
	movement speed ✻ exposure duration		None		1182.42		5		236.484		1.871		0.107		0.09
			Greenhouse-Geisser		1182.42		3.469		340.863		1.871		0.135		0.09
	Residuals		None		12005.6		95		126.374
			Greenhouse-Geisser		12005.6		65.909		182.154
	Note. Sphericity corrections not available for factors with 2 levels.
	Note. Type III Sum of Squares
	ᵃ Mauchly's test of sphericity indicates that the assumption of sphericity is violated (p < .05).
	Between Subjects Effects
	Cases		Sum of Squares		df		Mean Square		F		p		η²p
	Residuals		118240		19		6223.18
	Note. Type III Sum of Squares
	Assumption Checks
	Test of Sphericity
			Mauchly's W		Approx. Χ²		df		p-value		Greenhouse-Geisser ε		Huynh-Feldt ε		Lower Bound ε
	exposure duration		0.037		56.539		14		< .001		0.508		0.593		0.2
	movement movement speed ✻ exposure duration		0.295		20.877		14		0.108		0.694		0.868		0.2
	SSQ subscales
	Within Subjects Effects
	Cases		Sphericity Correction		Sum of Squares		df		Mean Square		F		p		η²p
	Score		None		73763.9	ᵃ	2	ᵃ	36882	ᵃ	14.855	ᵃ	< .001	ᵃ	0.439
			Greenhouse-Geisser		73763.9		1.129		65336.8		14.855		< .001		0.439
	Residuals		None		94348.9		38		2482.87
			Greenhouse-Geisser		94348.9		21.451		4398.43
	movement speed		None		6279.61		1		6279.61		2.101		0.164		0.1
	Residuals		None		56801.7		19		2989.56
	exposure duration		None		49115.1	ᵃ	5	ᵃ	9823.01	ᵃ	11.04	ᵃ	< .001	ᵃ	0.368
			Greenhouse-Geisser		49115.1		2.433		20189.4		11.04		< .001		0.368
	Residuals		None		84525.8		95		889.746
			Greenhouse-Geisser		84525.8		46.222		1828.71
	Score ✻ movement speed		None		459.903	ᵃ	2	ᵃ	229.952	ᵃ	0.8	ᵃ	0.457	ᵃ	0.04
			Greenhouse-Geisser		459.903		1.457		315.678		0.8		0.423		0.04
	Residuals		None		10926		38		287.527
			Greenhouse-Geisser		10926		27.681		394.717
	Score ✻ exposure duration		None		3657.05	ᵃ	10	ᵃ	365.705	ᵃ	3.018	ᵃ	0.001	ᵃ	0.137
			Greenhouse-Geisser		3657.05		3.636		1005.69		3.018		0.027		0.137
	Residuals		None		23023.8		190		121.178
			Greenhouse-Geisser		23023.8		69.091		333.24
	movement speed ✻ exposure duration		None		3233.46		5		646.692		2.067		0.076		0.098
			Greenhouse-Geisser		3233.46		3.469		932.102		2.067		0.104		0.098
	Residuals		None		29729.4		95		312.941
			Greenhouse-Geisser		29729.4		65.911		451.053
	Score ✻ movement speed ✻ exposure duration		None		1072.4	ᵃ	10	ᵃ	107.24	ᵃ	1.413	ᵃ	0.177	ᵃ	0.069
			Greenhouse-Geisser		1072.4		5.627		190.57		1.413		0.22		0.069
	Residuals		None		14418.8		190		75.888
			Greenhouse-Geisser		14418.8		106.92		134.856
	Note. Sphericity corrections not available for factors with 2 levels.
	Note. Type III Sum of Squares
	ᵃ Mauchly's test of sphericity indicates that the assumption of sphericity is violated (p < .05).
	Between Subjects Effects
	Cases		Sum of Squares		df		Mean Square		F		p
	Residuals		304196		19		16010.3
	Note. Type III Sum of Squares
	Assumption Checks
	Test of Sphericity
			Mauchly's W		Approx. Χ²		df		p-value		Greenhouse-Geisser ε		Huynh-Feldt ε		Lower Bound ε
	Score		0.228		26.573		2		< .001		0.564		0.576		0.5
	exposure duration		0.031		59.473		14		< .001		0.487		0.563		0.2
	Score ✻ movement speed		0.627		8.397		2		0.015		0.728		0.773		0.5
	Score ✻ exposure duration		1.633×10-4		134.866		54		< .001		0.364		0.46		0.1
	movement speed ✻ exposure duration		0.314		19.805		14		0.141		0.694		0.868		0.2
	Score ✻ movement speed ✻ exposure duration		0.004		85.396		54		0.007		0.563		0.827		0.1
	Respiration rate
	Within Subjects Effects
	Cases		Sphericity Correction		Sum of Squares		df		Mean Square		F		p		η²p
	movement speed		None		2.681		1		2.681		1.57		0.225		0.076
	Residuals		None		32.433		19		1.707
	exposure duration		None		28.582	ᵃ	4	ᵃ	7.146	ᵃ	8.615	ᵃ	< .001	ᵃ	0.312
			Greenhouse-Geisser		28.582		2.266		12.615		8.615		< .001		0.312
	Residuals		None		63.037		76		0.829
			Greenhouse-Geisser		63.037		43.049		1.464
	movement speed ✻ exposure duration		None		3.921		4		0.98		1.439		0.229		0.07
			Greenhouse-Geisser		3.921		2.786		1.407		1.439		0.243		0.07
	Residuals		None		51.749		76		0.681
			Greenhouse-Geisser		51.749		52.931		0.978
	Note. Sphericity corrections not available for factors with 2 levels.
	Note. Type III Sum of Squares
	ᵃ Mauchly's test of sphericity indicates that the assumption of sphericity is violated (p < .05).
	Between Subjects Effects
	Cases		Sum of Squares		df		Mean Square		F		p		η²p
	Residuals		177.73		19		9.354
	Note. Type III Sum of Squares
	LF/HF ratio
	Within Subjects Effects
	Cases		Sphericity Correction		Sum of Squares		df		Mean Square		F		p		η²p
	movement speed		None		1.559		1		1.559		6.189		0.022		0.246
	Residuals		None		4.787		19		0.252
	exposure duration		None		2.511	ᵃ	4	ᵃ	0.628	ᵃ	2.411	ᵃ	0.056	ᵃ	0.113
			Greenhouse-Geisser		2.511		2.67		0.941		2.411		0.084		0.113
	Residuals		None		19.787		76		0.26
			Greenhouse-Geisser		19.787		50.725		0.39
	movement speed ✻ exposure duration		None		0.333	ᵃ	4	ᵃ	0.083	ᵃ	0.636	ᵃ	0.638	ᵃ	0.032
			Greenhouse-Geisser		0.333		2.469		0.135		0.636		0.566		0.032
	Residuals		None		9.95		76		0.131
			Greenhouse-Geisser		9.95		46.919		0.212
	Note. Sphericity corrections not available for factors with 2 levels.
	Note. Type III Sum of Squares
	ᵃ Mauchly's test of sphericity indicates that the assumption of sphericity is violated (p < .05).
	Between Subjects Effects
	Cases		Sum of Squares		df		Mean Square		F		p		η²p
	Residuals		44.418		19		2.338
	Note. Type III Sum of Squares
	SDNN
	Within Subjects Effects
	Cases		Sphericity Correction		Sum of Squares		df		Mean Square		F		p		η²p
	movement speed		None		855.959		1		855.959		0.365		0.553		0.019
	Residuals		None		44503.7		19		2342.3
	exposure duration		None		1407.24	ᵃ	4	ᵃ	351.81	ᵃ	0.875	ᵃ	0.483	ᵃ	0.044
			Greenhouse-Geisser		1407.24		2.848		494.054		0.875		0.455		0.044
	Residuals		None		30566.1		76		402.185
			Greenhouse-Geisser		30566.1		54.119		564.797
	movement speed ✻ exposure duration		None		1471.53	ᵃ	4	ᵃ	367.881	ᵃ	1.309	ᵃ	0.274	ᵃ	0.064
			Greenhouse-Geisser		1471.53		2.734		538.139		1.309		0.281		0.064
	Residuals		None		21352.6		76		280.955
			Greenhouse-Geisser		21352.6		51.955		410.984
	Note. Sphericity corrections not available for factors with 2 levels.
	Note. Type III Sum of Squares
	ᵃ Mauchly's test of sphericity indicates that the assumption of sphericity is violated (p < .05).
	Between Subjects Effects
	Cases		Sum of Squares		df		Mean Square		F		p		η²p
	Residuals		138792		19		7304.83
	Note. Type III Sum of Squares
	RMSSD
	Within Subjects Effects
	Cases		Sphericity Correction		Sum of Squares		df		Mean Square		F		p		η²p
	movement speed		None		1.053		1		1.053		2.344×10-4		0.988		1.233×10-5
	Residuals		None		85332.2		19		4491.17
	exposure duration		None		2007.73	ᵃ	4	ᵃ	501.932	ᵃ	0.567	ᵃ	0.687	ᵃ	0.029
			Greenhouse-Geisser		2007.73		2.843		706.1		0.567		0.63		0.029
	Residuals		None		67258.9		76		884.986
			Greenhouse-Geisser		67258.9		54.025		1244.97
	movement speed ✻ exposure duration		None		1461.04	ᵃ	4	ᵃ	365.259	ᵃ	0.605	ᵃ	0.66	ᵃ	0.031
			Greenhouse-Geisser		1461.04		2.965		492.819		0.605		0.613		0.031
	Residuals		None		45895.7		76		603.89
			Greenhouse-Geisser		45895.7		56.328		814.787
	Note. Sphericity corrections not available for factors with 2 levels.
	Note. Type III Sum of Squares
	ᵃ Mauchly's test of sphericity indicates that the assumption of sphericity is violated (p < .05).
	Between Subjects Effects
	Cases		Sum of Squares		df		Mean Square		F		p		η²p
	Residuals		305568		19		16082.5
	Note. Type III Sum of Squares

## Sheet: Sheet2
	Response time
	Post Hoc Tests
	Post Hoc Comparisons - exposure duration
					Mean Difference		SE		t		Cohen's d		pbonf
	Block1		Block2		-0.169		0.049		-3.435		-0.651		0.006	**
			Block3		-0.156		0.049		-3.169		-0.601		0.011	*
	Block2		Block3		0.013		0.049		0.266		0.05		1
	* p < .05, ** p < .01, *** p < .001
	Note. P-value adjusted for comparing a family of 3
	Note. Results are averaged over the levels of: movement speed
	SSQ-TS
	Post Hoc Tests
	Post Hoc Comparisons - exposure duration
					Mean Difference		SE		t		Cohen's d		pbonf
	Pretest		Block1		-13.838		4.327		-3.198		-0.482		0.071
			Block2		-22.534		5.612		-4.015		-0.784		0.011	*
			Block3		-30.481		6.122		-4.979		-1.061		0.001	**
			Post-test		-18.232		5.176		-3.522		-0.634		0.034	*
			Post-removal		-10.659		4.131		-2.58		-0.371		0.275
	Block1		Block2		-8.696		1.981		-4.389		-0.303		0.005	**
			Block3		-16.643		3.408		-4.884		-0.579		0.002	**
			Post-test		-4.394		3.77		-1.166		-0.153		1
			Post-removal		3.179		4.434		0.717		0.111		1
	Block2		Block3		-7.947		2.441		-3.255		-0.277		0.062
			Post-test		4.301		3.723		1.155		0.15		1
			Post-removal		11.875		4.731		2.51		0.413		0.319
	Block3		Post-test		12.249		2.886		4.244		0.426		0.007	**
			Post-removal		19.822		4.952		4.003		0.69		0.011	*
	Post-test		Post-removal		7.574		3.919		1.933		0.264		1
	* p < .05, ** p < .01, *** p < .001
	Note. P-value adjusted for comparing a family of 15
	Note. Results are averaged over the levels of: movement speed
	SSQ subscales
	Post Hoc Tests
	Post Hoc Comparisons - exposure duration
					Mean Difference		SE		t		Cohen's d		pbonf
	Pre-test		Block1		-11.692		4.028		-2.903		-0.389		0.137
			Block2		-19.129		5.164		-3.704		-0.636		0.023	*
			Block3		-26.166		5.595		-4.677		-0.871		0.002	**
			Post-test		-15.499		4.608		-3.363		-0.516		0.049	*
			Post-removal		-8.239		3.586		-2.298		-0.274		0.497
	Block1		Block2		-7.438		1.731		-4.296		-0.247		0.006	**
			Block3		-14.474		3.055		-4.738		-0.482		0.002	**
			Post-test		-3.807		3.289		-1.158		-0.127		1
			Post-removal		3.452		3.976		0.868		0.115		1
	Block2		Block3		-7.037		2.252		-3.125		-0.234		0.084
			Post-test		3.63		3.362		1.08		0.121		1
			Post-removal		10.89		4.355		2.5		0.362		0.326
	Block3		Post-test		10.667		2.585		4.127		0.355		0.009	**
			Post-removal		17.927		4.563		3.928		0.596		0.014	*
	Post-test		Post-removal		7.26		3.513		2.066		0.242		0.79
	* p < .05, ** p < .01, *** p < .001
	Note. P-value adjusted for comparing a family of 15
	Note. Results are averaged over the levels of: movement speed, Score
	Post Hoc Comparisons - Score
					Mean Difference		SE		t		Cohen's d		pbonf
	N		O		-21.074		3.267		-6.45		-0.701		< .001	***
			D		-21.848		6.231		-3.506		-0.727		0.007	**
	O		D		-0.775		3.545		-0.218		-0.026		1
	** p < .01, *** p < .001
	Note. P-value adjusted for comparing a family of 3
	Note. Results are averaged over the levels of: exposure duration, movement speed
	Post Hoc Comparisons - Score ✻ exposure duration
					Mean Difference		SE		t		Cohen's d		pbonf
	N, Pre-test		O, Pre-test		-12.791		1.927		-6.636		-0.426		< .001	***
			D, Pre-test		-17.791		4.207		-4.229		-0.592		0.069
			N, Block1		-6.439		2.859		-2.252		-0.214		1
			O, Block1		-28.899		4.846		-5.964		-0.961		0.001	**
			D, Block1		-30.32		8.343		-3.634		-1.009		0.27
			N, Block2		-13.833		4.064		-3.404		-0.46		0.456
			O, Block2		-36.858		5.832		-6.32		-1.226		< .001	***
			D, Block2		-37.28		9.463		-3.939		-1.24		0.135
			N, Block3		-18.126		4.467		-4.058		-0.603		0.103
			O, Block3		-44.627		6.487		-6.88		-1.485		< .001	***
			D, Block3		-46.328		10.756		-4.307		-1.541		0.058
			N, Post-test		-10.971		3.285		-3.34		-0.365		0.526
			O, Post-test		-32.31		6.034		-5.355		-1.075		0.006	**
			D, Post-test		-33.8		9.168		-3.687		-1.124		0.24
			N, Post-removal		-6.678		3.57		-1.871		-0.222		1
			O, Post-removal		-27.004		4.493		-6.011		-0.898		0.001	**
			D, Post-removal		-21.62		5.773		-3.745		-0.719		0.21
	O, Pre-test		D, Pre-test		-5		3.097		-1.615		-0.166		1
			N, Block1		6.352		2.797		2.271		0.211		1
			O, Block1		-16.108		3.667		-4.392		-0.536		0.048	*
			D, Block1		-17.528		7.054		-2.485		-0.583		1
			N, Block2		-1.042		3.968		-0.262		-0.035		1
			O, Block2		-24.066		4.796		-5.018		-0.801		0.012	*
			D, Block2		-24.488		8.267		-2.962		-0.815		1
			N, Block3		-5.335		4.294		-1.242		-0.177		1
			O, Block3		-31.836		5.474		-5.816		-1.059		0.002	**
			D, Block3		-33.536		9.449		-3.549		-1.116		0.328
			N, Post-test		1.82		3.157		0.577		0.061		1
			O, Post-test		-19.518		5.124		-3.809		-0.649		0.181
			D, Post-test		-21.008		7.862		-2.672		-0.699		1
			N, Post-removal		6.113		3.883		1.574		0.203		1
			O, Post-removal		-14.212		4.132		-3.439		-0.473		0.421
			D, Post-removal		-8.828		4.953		-1.782		-0.294		1
	D, Pre-test		N, Block1		11.352		4.822		2.354		0.378		1
			O, Block1		-11.107		4.109		-2.703		-0.37		1
			D, Block1		-12.528		6.517		-1.922		-0.417		1
			N, Block2		3.959		5.755		0.688		0.132		1
			O, Block2		-19.066		4.821		-3.955		-0.634		0.13
			D, Block2		-19.488		7.767		-2.509		-0.648		1
			N, Block3		-0.335		5.602		-0.06		-0.011		1
			O, Block3		-26.836		5.141		-5.22		-0.893		0.007	**
			D, Block3		-28.536		8.387		-3.402		-0.949		0.457
			N, Post-test		6.82		4.547		1.5		0.227		1
			O, Post-test		-14.518		4.779		-3.038		-0.483		1
			D, Post-test		-16.008		6.309		-2.537		-0.533		1
			N, Post-removal		11.114		5.162		2.153		0.37		1
			O, Post-removal		-9.212		4.439		-2.075		-0.306		1
			D, Post-removal		-3.828		4.209		-0.91		-0.127		1
	N, Block1		O, Block1		-22.459		3.361		-6.682		-0.747		< .001	***
			D, Block1		-23.88		6.978		-3.422		-0.794		0.437
			N, Block2		-7.394		1.91		-3.87		-0.246		0.158
			O, Block2		-30.418		4.46		-6.82		-1.012		< .001	***
			D, Block2		-30.84		7.974		-3.868		-1.026		0.159
			N, Block3		-11.687		2.926		-3.995		-0.389		0.119
			O, Block3		-38.188		5.398		-7.074		-1.27		< .001	***
			D, Block3		-39.888		9.51		-4.194		-1.327		0.075
			N, Post-test		-4.532		2.409		-1.881		-0.151		1
			O, Post-test		-25.87		5.341		-4.843		-0.861		0.017	*
			D, Post-test		-27.36		8.211		-3.332		-0.91		0.536
			N, Post-removal		-0.238		3.066		-0.078		-0.008		1
			O, Post-removal		-20.564		3.81		-5.397		-0.684		0.005	**
			D, Post-removal		-15.18		5.277		-2.876		-0.505		1
	O, Block1		D, Block1		-1.421		4.231		-0.336		-0.047		1
			N, Block2		15.066		3.659		4.117		0.501		0.09
			O, Block2		-7.959		1.942		-4.098		-0.265		0.094
			D, Block2		-8.381		5.384		-1.557		-0.279		1
			N, Block3		10.773		4.224		2.55		0.358		1
			O, Block3		-15.728		3.138		-5.012		-0.523		0.012	*
			D, Block3		-17.429		6.811		-2.559		-0.58		1
			N, Post-test		17.928		3.853		4.653		0.596		0.027	*
			O, Post-test		-3.411		4.002		-0.852		-0.113		1
			D, Post-test		-4.901		5.811		-0.843		-0.163		1
			N, Post-removal		22.221		5.21		4.265		0.739		0.064
			O, Post-removal		1.895		4.273		0.443		0.063		1
			D, Post-removal		7.279		4.786		1.521		0.242		1
	D, Block1		N, Block2		16.486		6.688		2.465		0.548		1
			O, Block2		-6.538		3.751		-1.743		-0.218		1
			D, Block2		-6.96		2.368		-2.939		-0.232		1
			N, Block3		12.193		7.111		1.715		0.406		1
			O, Block3		-14.308		4.565		-3.134		-0.476		0.835
			D, Block3		-16.008		4.376		-3.658		-0.533		0.256
			N, Post-test		19.349		7.009		2.76		0.644		1
			O, Post-test		-1.99		5.517		-0.361		-0.066		1
			D, Post-test		-3.48		4.445		-0.783		-0.116		1
			N, Post-removal		23.642		8.073		2.929		0.787		1
			O, Post-removal		3.316		6.584		0.504		0.11		1
			D, Post-removal		8.7		5.642		1.542		0.289		1
	N, Block2		O, Block2		-23.025		4.117		-5.593		-0.766		0.003	**
			D, Block2		-23.447		7.445		-3.15		-0.78		0.808
			N, Block3		-4.293		1.985		-2.163		-0.143		1
			O, Block3		-30.794		5.123		-6.01		-1.025		0.001	**
			D, Block3		-32.495		9.064		-3.585		-1.081		0.302
			N, Post-test		2.862		2.382		1.201		0.095		1
			O, Post-test		-18.477		5.251		-3.519		-0.615		0.351
			D, Post-test		-19.967		8.059		-2.478		-0.664		1
			N, Post-removal		7.155		2.987		2.395		0.238		1
			O, Post-removal		-13.171		3.728		-3.533		-0.438		0.34
			D, Post-removal		-7.787		5.135		-1.516		-0.259		1
	O, Block2		D, Block2		-0.422		4.521		-0.093		-0.014		1
			N, Block3		18.732		4.489		4.173		0.623		0.079
			O, Block3		-7.769		2.084		-3.727		-0.258		0.219
			D, Block3		-9.47		5.75		-1.647		-0.315		1
			N, Post-test		25.887		4.321		5.991		0.861		0.001	**
			O, Post-test		4.548		3.56		1.278		0.151		1
			D, Post-test		3.058		5.008		0.611		0.102		1
			N, Post-removal		30.18		5.735		5.263		1.004		0.007	**
			O, Post-removal		9.854		4.245		2.321		0.328		1
			D, Post-removal		15.238		4.391		3.47		0.507		0.392
	D, Block2		N, Block3		19.154		7.883		2.43		0.637		1
			O, Block3		-7.348		5.026		-1.462		-0.244		1
			D, Block3		-9.048		3.465		-2.611		-0.301		1
			N, Post-test		26.309		7.936		3.315		0.875		0.557
			O, Post-test		4.97		6.583		0.755		0.165		1
			D, Post-test		3.48		4.908		0.709		0.116		1
			N, Post-removal		30.602		9.093		3.365		1.018		0.497
			O, Post-removal		10.276		7.61		1.35		0.342		1
			D, Post-removal		15.66		6.62		2.366		0.521		1
	N, Block3		O, Block3		-26.501		4.929		-5.376		-0.882		0.005	**
			D, Block3		-28.202		8.946		-3.152		-0.938		0.803
			N, Post-test		7.155		2.119		3.376		0.238		0.485
			O, Post-test		-14.184		4.706		-3.014		-0.472		1
			D, Post-test		-15.673		7.641		-2.051		-0.521		1
			N, Post-removal		11.448		2.599		4.405		0.381		0.047	*
			O, Post-removal		-8.878		3.596		-2.469		-0.295		1
			D, Post-removal		-3.493		4.926		-0.709		-0.116		1
	O, Block3		D, Block3		-1.7		5.152		-0.33		-0.057		1
			N, Post-test		33.656		4.832		6.965		1.12		< .001	***
			O, Post-test		12.317		3.048		4.041		0.41		0.107
			D, Post-test		10.828		4.454		2.431		0.36		1
			N, Post-removal		37.949		6.499		5.839		1.263		0.002	**
			O, Post-removal		17.623		4.554		3.87		0.586		0.158
			D, Post-removal		23.008		4.906		4.689		0.765		0.024	*
	D, Block3		N, Post-test		35.357		9.07		3.898		1.176		0.148
			O, Post-test		14.018		6.838		2.05		0.466		1
			D, Post-test		12.528		3.865		3.241		0.417		0.658
			N, Post-removal		39.65		10.326		3.84		1.319		0.169
			O, Post-removal		19.324		8.327		2.321		0.643		1
			D, Post-removal		24.708		7.185		3.439		0.822		0.421
	N, Post-test		O, Post-test		-21.339		4.001		-5.333		-0.71		0.006	**
			D, Post-test		-22.828		7.347		-3.107		-0.759		0.887
			N, Post-removal		4.293		2.42		1.774		0.143		1
			O, Post-removal		-16.033		2.833		-5.659		-0.533		0.003	**
			D, Post-removal		-10.649		4.387		-2.427		-0.354		1
	O, Post-test		D, Post-test		-1.49		4.526		-0.329		-0.05		1
			N, Post-removal		25.632		5.765		4.446		0.853		0.042	*
			O, Post-removal		5.306		3.96		1.34		0.177		1
			D, Post-removal		10.69		4.405		2.427		0.356		1
	D, Post-test		N, Post-removal		27.122		8.573		3.163		0.902		0.783
			O, Post-removal		6.796		6.395		1.063		0.226		1
			D, Post-removal		12.18		5.096		2.39		0.405		1
	N, Post-removal		O, Post-removal		-20.326		3.429		-5.927		-0.676		0.002	**
			D, Post-removal		-14.942		4.587		-3.258		-0.497		0.634
	O, Post-removal		D, Post-removal		5.384		2.733		1.97		0.179		1
	* p < .05, ** p < .01, *** p < .001
	Note. P-value adjusted for comparing a family of 153
	Note. Results are averaged over the levels of: movement speed
	Respiration rate
	Post Hoc Tests
	Post Hoc Comparisons - exposure duration
					Mean Difference		SE		t		Cohen's d		pbonf
	Pre-test		Block1		0.695		0.239		2.901		0.531		0.092
			Block2		0.913		0.25		3.652		0.698		0.017	*
			Block3		0.993		0.273		3.641		0.759		0.017	*
			Post-test		0.291		0.194		1.506		0.223		1
	Block1		Block2		0.219		0.106		2.058		0.167		0.536
			Block3		0.298		0.134		2.229		0.228		0.381
			Post-test		-0.403		0.225		-1.793		-0.309		0.889
	Block2		Block3		0.079		0.136		0.582		0.061		1
			Post-test		-0.622		0.212		-2.936		-0.476		0.085
	Block3		Post-test		-0.701		0.199		-3.522		-0.536		0.023	*
	* p < .05, *** p < .001
	Note. P-value adjusted for comparing a family of 10
	Note. Results are averaged over the levels of: movement speed
	LF/HF ratio
	Post Hoc Tests
	Post Hoc Comparisons - movement movement speed
					Mean Difference		SE		t		Cohen's d		pbonf
	Slow		Fast		0.177		0.071		2.488		0.274		0.022	*
	* p < .05, *** p < .001
	Note. Results are averaged over the levels of: exposure duration
