# Supplementary material for: Cybersickness in Augmented Reality: Subjective and physiological changes with the course of prolonged exposure
Source: Research Square preprint supplement (doi:10.21203/rs.3.rs-7182892/v1), 2025-11-03
Supplement: Supplementary file 2 [file Spreadsheets_S2.xlsx]

## Sheet: Sheet1
	Accuracy
	Within Subjects Effects
	Cases		Sum of Squares		df		Mean Square		F		p		η²p
	movement speed		517.71		1		517.71		0.685		0.419		0.037
	movement speed ✻ group		717.71		1		717.71		0.95		0.343		0.05
	Residuals		13595.6		18		755.312
	exposure duration		147.694		2		73.847		0.155		0.857		0.009
	exposure duration ✻ group		971.027		2		485.513		1.016		0.372		0.053
	Residuals		17197.3		36		477.703
	movement speed ✻ exposure duration		244.158		2		122.079		0.222		0.802		0.012
	movement speed ✻ exposure duration ✻ group		894.158		2		447.079		0.812		0.452		0.043
	Residuals		19817.5		36		550.486
	Note. Type III Sum of Squares
	Between Subjects Effects
	Cases		Sum of Squares		df		Mean Square		F		p		η²p
	group		2950.03		1		2950.03		3.613		0.073		0.167
	Residuals		14696.6		18		816.48
	Note. Type III Sum of Squares
	Response time
	Within Subjects Effects
	Cases		Sum of Squares		df		Mean Square		F		p		η²p
	movement speed		0.093		1		0.093		0.748		0.403		0.054
	movement speed ✻ group		0.054		1		0.054		0.436		0.521		0.032
	Residuals		1.609		13		0.124
	exposure duration		0.509		2		0.254		6.676		0.005		0.339
	exposure duration ✻ group		0.024		2		0.012		0.314		0.733		0.024
	Residuals		0.991		26		0.038
	movement speed ✻ exposure duration		0.094		2		0.047		1.078		0.355		0.077
	movement speed ✻ exposure duration ✻ group		0.094		2		0.047		1.075		0.356		0.076
	Residuals		1.133		26		0.044
	Note. Type III Sum of Squares
	Between Subjects Effects
	Cases		Sum of Squares		df		Mean Square		F		p		η²p
	group		0.138		1		0.138		1.124		0.308		0.08
	Residuals		1.601		13		0.123
	Note. Type III Sum of Squares
	SSQ-TS
	Within Subjects Effects
	Cases		Sphericity Correction		Sum of Squares		df		Mean Square		F		p		η²p
	movement speed		None		1807.03		1		1807.03		2.064		0.168		0.103
	movement speed ✻ group		None		7911.92		1		7911.92		9.036		0.008		0.334
	Residuals		None		15760		18		875.555
	exposure duration		None		21311.6	ᵃ	5	ᵃ	4262.33	ᵃ	11.262	ᵃ	< .001	ᵃ	0.385
			Greenhouse-Geisser		21311.6		2.532		8416.97		11.262		< .001		0.385
	exposure duration ✻ group		None		311.351	ᵃ	5	ᵃ	62.27	ᵃ	0.165	ᵃ	0.975	ᵃ	0.009
			Greenhouse-Geisser		311.351		2.532		122.967		0.165		0.893		0.009
	Residuals		None		34063.4		90		378.482
			Greenhouse-Geisser		34063.4		45.576		747.403
	movement speed ✻ exposure duration		None		1178.4		5		235.68		1.912		0.1		0.096
			Greenhouse-Geisser		1178.4		3.293		357.806		1.912		0.132		0.096
	movement speed ✻ exposure duration ✻ group		None		914.733		5		182.947		1.485		0.203		0.076
			Greenhouse-Geisser		914.733		3.293		277.747		1.485		0.225		0.076
	Residuals		None		11090.8		90		123.231
			Greenhouse-Geisser		11090.8		59.281		187.088
	Note. Sphericity corrections not available for factors with 2 levels.
	Note. Type III Sum of Squares
	ᵃ Mauchly's test of sphericity indicates that the assumption of sphericity is violated (p < .05).
	Between Subjects Effects
	Cases		Sum of Squares		df		Mean Square		F		p		η²p
	group		203.541		1		203.541		0.031		0.862		0.002
	Residuals		118037		18		6557.61
	Note. Type III Sum of Squares
	Assumption Checks
	Test of Sphericity
			Mauchly's W		Approx. Χ²		df		p-value		Greenhouse-Geisser ε		Huynh-Feldt ε		Lower Bound ε
	exposure duration		0.035		54.027		14		< .001		0.506		0.596		0.2
	movement speed ✻ exposure duration		0.263		21.504		14		0.093		0.659		0.824		0.2
	SSQ subscales
	Within Subjects Effects
	Cases		Sphericity Correction		Sum of Squares		df		Mean Square		F		p		η²p
	Score		None		70788.3	ᵃ	2	ᵃ	35394.1	ᵃ	13.85	ᵃ	< .001	ᵃ	0.435
			Greenhouse-Geisser		70788.3		1.132		62508.6		13.85		< .001		0.435
	Score ✻ group		None		2348.07	ᵃ	2	ᵃ	1174.04	ᵃ	0.459	ᵃ	0.635	ᵃ	0.025
			Greenhouse-Geisser		2348.07		1.132		2073.43		0.459		0.529		0.025
	Residuals		None		92000.9		36		2555.58
			Greenhouse-Geisser		92000.9		20.384		4513.34
	movement speed		None		4266.25		1		4266.25		1.995		0.175		0.1
	movement speed ✻ group		None		18306.7		1		18306.7		8.56		0.009		0.322
	Residuals		None		38495		18		2138.61
	exposure duration		None		47723.4	ᵃ	5	ᵃ	9544.67	ᵃ	10.255	ᵃ	< .001	ᵃ	0.363
			Greenhouse-Geisser		47723.4		2.429		19648.7		10.255		< .001		0.363
	exposure duration ✻ group		None		761.627	ᵃ	5	ᵃ	152.325	ᵃ	0.164	ᵃ	0.975	ᵃ	0.009
			Greenhouse-Geisser		761.627		2.429		313.577		0.164		0.886		0.009
	Residuals		None		83764.2		90		930.713
			Greenhouse-Geisser		83764.2		43.719		1915.97
	Score ✻ movement speed		None		303.438	ᵃ	2	ᵃ	151.719	ᵃ	0.584	ᵃ	0.563	ᵃ	0.031
			Greenhouse-Geisser		303.438		1.417		214.173		0.584		0.508		0.031
	Score ✻ movement speed ✻ group		None		1577.57	ᵃ	2	ᵃ	788.786	ᵃ	3.038	ᵃ	0.06	ᵃ	0.144
			Greenhouse-Geisser		1577.57		1.417		1113.48		3.038		0.081		0.144
	Residuals		None		9348.44		36		259.679
			Greenhouse-Geisser		9348.44		25.502		366.574
	Score ✻ exposure duration		None		3540.1	ᵃ	10	ᵃ	354.01	ᵃ	2.831	ᵃ	0.003	ᵃ	0.136
			Greenhouse-Geisser		3540.1		3.596		984.48		2.831		0.036		0.136
	Score ✻ exposure duration ✻ group		None		512.146	ᵃ	10	ᵃ	51.215	ᵃ	0.41	ᵃ	0.941	ᵃ	0.022
			Greenhouse-Geisser		512.146		3.596		142.425		0.41		0.781		0.022
	Residuals		None		22511.6		180		125.065
			Greenhouse-Geisser		22511.6		64.726		347.797
	movement speed ✻ exposure duration		None		3215.97		5		643.195		2.119		0.07		0.105
			Greenhouse-Geisser		3215.97		3.342		962.408		2.119		0.101		0.105
	movement speed ✻ exposure duration ✻ group		None		2405.77		5		481.153		1.585		0.172		0.081
			Greenhouse-Geisser		2405.77		3.342		719.947		1.585		0.198		0.081
	Residuals		None		27323.6		90		303.595
			Greenhouse-Geisser		27323.6		60.149		454.268
	Score ✻ movement speed ✻ exposure duration		None		1001.79	ᵃ	10	ᵃ	100.179	ᵃ	1.331	ᵃ	0.217	ᵃ	0.069
			Greenhouse-Geisser		1001.79		5.599		178.929		1.331		0.253		0.069
	Score ✻ movement speed ✻ exposure duration ✻ group		None		867.928	ᵃ	10	ᵃ	86.793	ᵃ	1.153	ᵃ	0.326	ᵃ	0.06
			Greenhouse-Geisser		867.928		5.599		155.02		1.153		0.338		0.06
	Residuals		None		13550.9		180		75.283
			Greenhouse-Geisser		13550.9		100.778		134.462
	Note. Sphericity corrections not available for factors with 2 levels.
	Note. Type III Sum of Squares
	ᵃ Mauchly's test of sphericity indicates that the assumption of sphericity is violated (p < .05).
	Between Subjects Effects
	Cases		Sum of Squares		df		Mean Square		F		p		η²p
	group		216.708		1		216.708		0.013		0.911		7.124×10-4
	Residuals		303979		18		16887.7
	Note. Type III Sum of Squares
	Assumption Checks
	Test of Sphericity
			Mauchly's W		Approx. Χ²		df		p-value		Greenhouse-Geisser ε		Huynh-Feldt ε		Lower Bound ε
	Score		0.234		24.697		2		< .001		0.566		0.579		0.5
	exposure duration		0.03		56.629		14		< .001		0.486		0.567		0.2
	Score ✻ movement speed		0.588		9.017		2		0.011		0.708		0.751		0.5
	Score ✻ exposure duration		1.285×10-4		129.615		54		< .001		0.36		0.46		0.1
	movement speed ✻ exposure duration		0.288		20.069		14		0.133		0.668		0.839		0.2
	Score ✻ movement speed ✻ exposure duration		0.003		82.905		54		0.011		0.56		0.842		0.1
	Respiration rate
	Within Subjects Effects
	Cases		Sphericity Correction		Sum of Squares		df		Mean Square		F		p		η²p
	movement speed		None		2.248		1		2.248		1.316		0.266		0.068
	movement speed ✻ group		None		1.679		1		1.679		0.983		0.335		0.052
	Residuals		None		30.753		18		1.709
	exposure duration		None		29.505	ᵃ	4	ᵃ	7.376	ᵃ	8.736	ᵃ	< .001	ᵃ	0.327
			Greenhouse-Geisser		29.505		2.253		13.095		8.736		< .001		0.327
	exposure duration ✻ group		None		2.245	ᵃ	4	ᵃ	0.561	ᵃ	0.665	ᵃ	0.619	ᵃ	0.036
			Greenhouse-Geisser		2.245		2.253		0.996		0.665		0.537		0.036
	Residuals		None		60.792		72		0.844
			Greenhouse-Geisser		60.792		40.556		1.499
	movement speed ✻ exposure duration		None		3.455		4		0.864		1.245		0.3		0.065
			Greenhouse-Geisser		3.455		2.801		1.234		1.245		0.303		0.065
	movement speed ✻ exposure duration ✻ group		None		1.779		4		0.445		0.641		0.635		0.034
			Greenhouse-Geisser		1.779		2.801		0.635		0.641		0.582		0.034
	Residuals		None		49.97		72		0.694
			Greenhouse-Geisser		49.97		50.41		0.991
	Note. Sphericity corrections not available for factors with 2 levels.
	Note. Type III Sum of Squares
	ᵃ Mauchly's test of sphericity indicates that the assumption of sphericity is violated (p < .05).
	Between Subjects Effects
	Cases		Sum of Squares		df		Mean Square		F		p		η²p
	group		33.958		1		33.958		4.252		0.054		0.191
	Residuals		143.771		18		7.987
	Note. Type III Sum of Squares
	Assumption Checks
	Test of Sphericity
			Mauchly's W		Approx. Χ²		df		p-value		Greenhouse-Geisser ε		Huynh-Feldt ε		Lower Bound ε
	exposure duration		0.171		29.011		9		< .001		0.563		0.648		0.25
	movement speed ✻ exposure duration		0.38		15.873		9		0.071		0.7		0.842		0.25
	LF/HF ratio
	Within Subjects Effects
	Cases		Sphericity Correction		Sum of Squares		df		Mean Square		F		p		η²p
	movement speed		None		1.568		1		1.568		5.909		0.026		0.247
	movement speed ✻ group		None		0.01		1		0.01		0.037		0.85		0.002
	Residuals		None		4.777		18		0.265
	exposure duration		None		2.811	ᵃ	4	ᵃ	0.703	ᵃ	2.734	ᵃ	0.035	ᵃ	0.132
			Greenhouse-Geisser		2.811		2.645		1.063		2.734		0.061		0.132
	exposure duration ✻ group		None		1.284	ᵃ	4	ᵃ	0.321	ᵃ	1.249	ᵃ	0.298	ᵃ	0.065
			Greenhouse-Geisser		1.284		2.645		0.485		1.249		0.301		0.065
	Residuals		None		18.504		72		0.257
			Greenhouse-Geisser		18.504		47.61		0.389
	movement speed ✻ exposure duration		None		0.311		4		0.078		0.684		0.605		0.037
			Greenhouse-Geisser		0.311		2.855		0.109		0.684		0.559		0.037
	movement speed ✻ exposure duration ✻ group		None		1.758		4		0.439		3.863		0.007		0.177
			Greenhouse-Geisser		1.758		2.855		0.616		3.863		0.016		0.177
	Residuals		None		8.192		72		0.114
			Greenhouse-Geisser		8.192		51.385		0.159
	Note. Sphericity corrections not available for factors with 2 levels.
	Note. Type III Sum of Squares
	ᵃ Mauchly's test of sphericity indicates that the assumption of sphericity is violated (p < .05).
	Between Subjects Effects
	Cases		Sum of Squares		df		Mean Square		F		p		η²p
	group		0.928		1		0.928		0.384		0.543		0.021
	Residuals		43.49		18		2.416
	Note. Type III Sum of Squares
	Assumption Checks
	Test of Sphericity
			Mauchly's W		Approx. Χ²		df		p-value		Greenhouse-Geisser ε		Huynh-Feldt ε		Lower Bound ε
	exposure duration		0.229		24.175		9		0.004		0.661		0.786		0.25
	movement speed ✻ exposure duration		0.48		12.059		9		0.212		0.714		0.862		0.25
	SDNN
	Within Subjects Effects
	Cases		Sphericity Correction		Sum of Squares		df		Mean Square		F		p		η²p
	movement speed		None		1013.12		1		1013.12		0.417		0.527		0.023
	movement speed ✻ group		None		739.507		1		739.507		0.304		0.588		0.017
	Residuals		None		43764.2		18		2431.35
	exposure duration		None		1528.66	ᵃ	4	ᵃ	382.165	ᵃ	0.935	ᵃ	0.449	ᵃ	0.049
			Greenhouse-Geisser		1528.66		2.774		551.166		0.935		0.425		0.049
	exposure duration ✻ group		None		1145.14	ᵃ	4	ᵃ	286.286	ᵃ	0.701	ᵃ	0.594	ᵃ	0.037
			Greenhouse-Geisser		1145.14		2.774		412.887		0.701		0.545		0.037
	Residuals		None		29420.9		72		408.624
			Greenhouse-Geisser		29420.9		49.923		589.325
	movement speed ✻ exposure duration		None		1510.96	ᵃ	4	ᵃ	377.74	ᵃ	1.282	ᵃ	0.285	ᵃ	0.066
			Greenhouse-Geisser		1510.96		2.719		555.604		1.282		0.291		0.066
	movement speed ✻ exposure duration ✻ group		None		133.636	ᵃ	4	ᵃ	33.409	ᵃ	0.113	ᵃ	0.977	ᵃ	0.006
			Greenhouse-Geisser		133.636		2.719		49.14		0.113		0.94		0.006
	Residuals		None		21219		72		294.708
			Greenhouse-Geisser		21219		48.951		433.475
	Note. Sphericity corrections not available for factors with 2 levels.
	Note. Type III Sum of Squares
	ᵃ Mauchly's test of sphericity indicates that the assumption of sphericity is violated (p < .05).
	Between Subjects Effects
	Cases		Sum of Squares		df		Mean Square		F		p		η²p
	group		5168.83		1		5168.83		0.696		0.415		0.037
	Residuals		133623		18		7423.5
	Note. Type III Sum of Squares
	Assumption Checks
	Test of Sphericity
			Mauchly's W		Approx. Χ²		df		p-value		Greenhouse-Geisser ε		Huynh-Feldt ε		Lower Bound ε
	exposure duration		0.241		23.36		9		0.006		0.693		0.832		0.25
	movement speed ✻ exposure duration		0.239		23.512		9		0.005		0.68		0.813		0.25
	RMSSD
	Within Subjects Effects
	Cases		Sphericity Correction		Sum of Squares		df		Mean Square		F		p		η²p
	movement speed		None		10.34		1		10.34		0.002		0.963		1.238×10-4
	movement speed ✻ group		None		1794.62		1		1794.62		0.387		0.542		0.021
	Residuals		None		83537.6		18		4640.98
	exposure duration		None		2150.23	ᵃ	4	ᵃ	537.558	ᵃ	0.587	ᵃ	0.673	ᵃ	0.032
			Greenhouse-Geisser		2150.23		2.79		770.582		0.587		0.614		0.032
	exposure duration ✻ group		None		1365.99	ᵃ	4	ᵃ	341.497	ᵃ	0.373	ᵃ	0.827	ᵃ	0.02
			Greenhouse-Geisser		1365.99		2.79		489.532		0.373		0.758		0.02
	Residuals		None		65892.9		72		915.18
			Greenhouse-Geisser		65892.9		50.227		1311.9
	movement speed ✻ exposure duration		None		1506.72	ᵃ	4	ᵃ	376.679	ᵃ	0.619	ᵃ	0.65	ᵃ	0.033
			Greenhouse-Geisser		1506.72		2.99		503.898		0.619		0.605		0.033
	movement speed ✻ exposure duration ✻ group		None		2095.51	ᵃ	4	ᵃ	523.876	ᵃ	0.861	ᵃ	0.492	ᵃ	0.046
			Greenhouse-Geisser		2095.51		2.99		700.809		0.861		0.467		0.046
	Residuals		None		43800.2		72		608.336
			Greenhouse-Geisser		43800.2		53.822		813.793
	Note. Sphericity corrections not available for factors with 2 levels.
	Note. Type III Sum of Squares
	ᵃ Mauchly's test of sphericity indicates that the assumption of sphericity is violated (p < .05).
	Between Subjects Effects
	Cases		Sum of Squares		df		Mean Square		F		p		η²p
	group		12388		1		12388		0.761		0.395		0.041
	Residuals		293180		18		16287.8
	Note. Type III Sum of Squares
	Assumption Checks
	Test of Sphericity
			Mauchly's W		Approx. Χ²		df		p-value		Greenhouse-Geisser ε		Huynh-Feldt ε		Lower Bound ε
	exposure duration		0.333		18.037		9		0.036		0.698		0.839		0.25
	movement speed ✻ exposure duration		0.264		21.846		9		0.01		0.748		0.913		0.25

## Sheet: Sheet2
	Response exposure duration
	Post Hoc Tests
	Post Hoc Comparisons - exposure duration
					Mean Difference		SE		t		Cohen's d		pbonf
	Block1		Block2		-0.172		0.051		-3.351		-0.659		0.007	**
			Block3		-0.151		0.051		-2.938		-0.578		0.021	*
	Block2		Block3		0.021		0.051		0.412		0.081		1
	* p < .05, ** p < .01, *** p < .001
	Note. P-value adjusted for comparing a family of 3
	Note. Results are averaged over the levels of: group, movement speed
	SSQ-TS
	Post Hoc Tests
	Post Hoc Comparisons - exposure duration
					Mean Difference		SE		t		Cohen's d		pbonf
	Pretest		Block1		-13.713		4.459		-3.076		-0.476		0.098
			Block2		-22.393		5.786		-3.87		-0.778		0.017	*
			Block3		-30.241		6.296		-4.803		-1.051		0.002	**
			Post-test		-18.313		5.342		-3.428		-0.636		0.045	*
			Post-removal		-10.71		4.264		-2.512		-0.372		0.326
	Block1		Block2		-8.679		2.045		-4.243		-0.302		0.007	**
			Block3		-16.528		3.508		-4.711		-0.574		0.003	**
			Post-test		-4.599		3.863		-1.191		-0.16		1
			Post-removal		3.003		4.559		0.659		0.104		1
	Block2		Block3		-7.848		2.51		-3.127		-0.273		0.087
			Post-test		4.08		3.809		1.071		0.142		1
			Post-removal		11.683		4.864		2.402		0.406		0.41
	Block3		Post-test		11.928		2.883		4.138		0.414		0.009	**
			Post-removal		19.531		5.067		3.854		0.679		0.017	*
	Post-test		Post-removal		7.603		4.046		1.879		0.264		1
	* p < .05, ** p < .01, *** p < .001
	Note. P-value adjusted for comparing a family of 15
	Note. Results are averaged over the levels of: group, movement speed
	Post Hoc Comparisons - group ✻ movement speed
					Mean Difference		SE		t		Cohen's d		pbonf
	group1, Slow		group2, Slow		13.392		11.186		1.197		0.465		1
			group1, Fast		6.026		5.695		1.058		0.209		1
			group2, Fast		-3.664		11.186		-0.328		-0.127		1
	group2, Slow		group1, Fast		-7.367		11.186		-0.659		-0.256		1
			group2, Fast		-17.057		5.151		-3.311		-0.593		0.023	*
	group1, Fast		group2, Fast		-9.69		11.186		-0.866		-0.337		1
	* p < .05, *** p < .001
	Note. P-value adjusted for comparing a family of 6
	Note. Results are averaged over the levels of: exposure duration
	SSQ subscales
	Post Hoc Tests
	Post Hoc Comparisons - exposure duration
					Mean Difference		SE		t		Cohen's d		pbonf
	Pre-test		Block1		-11.581		4.151		-2.79		-0.383		0.181
			Block2		-18.986		5.322		-3.567		-0.629		0.033	*
			Block3		-25.926		5.749		-4.51		-0.859		0.004	**
			Post-test		-15.532		4.758		-3.265		-0.514		0.065
			Post-removal		-8.282		3.702		-2.238		-0.274		0.572
	Block1		Block2		-7.405		1.786		-4.146		-0.245		0.009	**
			Block3		-14.345		3.14		-4.569		-0.475		0.004	**
			Post-test		-3.951		3.379		-1.169		-0.131		1
			Post-removal		3.299		4.089		0.807		0.109		1
	Block2		Block3		-6.941		2.314		-3		-0.23		0.115
			Post-test		3.453		3.447		1.002		0.114		1
			Post-removal		10.703		4.476		2.391		0.354		0.419
	Block3		Post-test		10.394		2.59		4.013		0.344		0.012	*
			Post-removal		17.644		4.665		3.782		0.584		0.02	*
	Post-test		Post-removal		7.25		3.628		1.998		0.24		0.915
	* p < .05, ** p < .01, *** p < .001
	Note. P-value adjusted for comparing a family of 15
	Note. Results are averaged over the levels of: group,movement speed, Score
	Post Hoc Comparisons - Score
					Mean Difference		SE		t		Cohen's d		pbonf
	N		O		-20.866		3.338		-6.251		-0.691		< .001	***
			D		-21.404		6.349		-3.371		-0.709		0.01	*
	O		D		-0.538		3.618		-0.149		-0.018		1
	** p < .01, *** p < .001
	Note. P-value adjusted for comparing a family of 3
	Note. Results are averaged over the levels of: group,exposure duration, movement speed
	Post Hoc Comparisons - Score ✻ exposure duration
					Mean Difference		SE		t		Cohen's d		pbonf
	N, Pre-test		O, Pre-test		-12.589		1.932		-6.515		-0.417		< .001	***
			D, Pre-test		-17.508		4.292		-4.079		-0.58		0.108
			N, Block1		-6.24		2.915		-2.141		-0.207		1
			O, Block1		-28.649		4.969		-5.766		-0.949		0.003	**
			D, Block1		-29.952		8.571		-3.495		-0.992		0.396
			N, Block2		-13.78		4.194		-3.285		-0.456		0.629
			O, Block2		-36.573		5.984		-6.112		-1.211		0.001	**
			D, Block2		-36.701		9.676		-3.793		-1.215		0.204
			N, Block3		-18.068		4.61		-3.919		-0.598		0.154
			O, Block3		-44.249		6.639		-6.665		-1.465		< .001	***
			D, Block3		-45.559		10.958		-4.158		-1.509		0.09
			N, Post-test		-11.082		3.382		-3.277		-0.367		0.641
			O, Post-test		-32.286		6.23		-5.182		-1.069		0.01	**
			D, Post-test		-33.327		9.401		-3.545		-1.104		0.354
			N, Post-removal		-6.794		3.676		-1.848		-0.225		1
			O, Post-removal		-26.811		4.617		-5.807		-0.888		0.003	**
			D, Post-removal		-21.34		5.925		-3.602		-0.707		0.312
	O, Pre-test		D, Pre-test		-4.919		3.192		-1.541		-0.163		1
			N, Block1		6.349		2.888		2.198		0.21		1
			O, Block1		-16.06		3.785		-4.243		-0.532		0.075
			D, Block1		-17.363		7.273		-2.387		-0.575		1
			N, Block2		-1.191		4.082		-0.292		-0.039		1
			O, Block2		-23.984		4.949		-4.847		-0.794		0.02	*
			D, Block2		-24.112		8.49		-2.84		-0.798		1
			N, Block3		-5.479		4.421		-1.239		-0.181		1
			O, Block3		-31.66		5.637		-5.616		-1.048		0.004	**
			D, Block3		-32.97		9.665		-3.411		-1.092		0.476
			N, Post-test		1.507		3.176		0.475		0.05		1
			O, Post-test		-19.697		5.274		-3.735		-0.652		0.232
			D, Post-test		-20.737		8.093		-2.562		-0.687		1
			N, Post-removal		5.795		3.939		1.471		0.192		1
			O, Post-removal		-14.222		4.267		-3.333		-0.471		0.566
			D, Post-removal		-8.751		5.111		-1.712		-0.29		1
	D, Pre-test		N, Block1		11.269		4.975		2.265		0.373		1
			O, Block1		-11.14		4.242		-2.626		-0.369		1
			D, Block1		-12.444		6.727		-1.85		-0.412		1
			N, Block2		3.728		5.917		0.63		0.123		1
			O, Block2		-19.065		4.978		-3.83		-0.631		0.188
			D, Block2		-19.193		7.99		-2.402		-0.636		1
			N, Block3		-0.56		5.76		-0.097		-0.019		1
			O, Block3		-26.741		5.304		-5.042		-0.885		0.013	*
			D, Block3		-28.051		8.584		-3.268		-0.929		0.654
			N, Post-test		6.427		4.603		1.396		0.213		1
			O, Post-test		-14.777		4.897		-3.017		-0.489		1
			D, Post-test		-15.818		6.499		-2.434		-0.524		1
			N, Post-removal		10.715		5.247		2.042		0.355		1
			O, Post-removal		-9.303		4.579		-2.032		-0.308		1
			D, Post-removal		-3.832		4.346		-0.882		-0.127		1
	N, Block1		O, Block1		-22.409		3.469		-6.46		-0.742		< .001	***
			D, Block1		-23.712		7.195		-3.296		-0.785		0.615
			N, Block2		-7.54		1.942		-3.883		-0.25		0.167
			O, Block2		-30.334		4.601		-6.593		-1.004		< .001	***
			D, Block2		-30.462		8.185		-3.721		-1.009		0.239
			N, Block3		-11.829		3.002		-3.94		-0.392		0.147
			O, Block3		-38.009		5.558		-6.839		-1.259		< .001	***
			D, Block3		-39.32		9.728		-4.042		-1.302		0.117
			N, Post-test		-4.842		2.378		-2.037		-0.16		1
			O, Post-test		-26.046		5.5		-4.736		-0.862		0.025	*
			D, Post-test		-27.087		8.454		-3.204		-0.897		0.753
			N, Post-removal		-0.554		3.077		-0.18		-0.018		1
			O, Post-removal		-20.572		3.934		-5.229		-0.681		0.009	**
			D, Post-removal		-15.1		5.446		-2.773		-0.5		1
	O, Block1		D, Block1		-1.303		4.36		-0.299		-0.043		1
			N, Block2		14.869		3.75		3.965		0.492		0.139
			O, Block2		-7.925		2.004		-3.955		-0.262		0.142
			D, Block2		-8.052		5.505		-1.463		-0.267		1
			N, Block3		10.581		4.338		2.439		0.35		1
			O, Block3		-15.6		3.226		-4.835		-0.517		0.02	*
			D, Block3		-16.911		6.926		-2.442		-0.56		1
			N, Post-test		17.567		3.887		4.52		0.582		0.041	*
			O, Post-test		-3.637		4.098		-0.887		-0.12		1
			D, Post-test		-4.678		5.977		-0.783		-0.155		1
			N, Post-removal		21.855		5.31		4.116		0.724		0.099
			O, Post-removal		1.838		4.41		0.417		0.061		1
			D, Post-removal		7.309		4.941		1.479		0.242		1
	D, Block1		N, Block2		16.172		6.866		2.356		0.536		1
			O, Block2		-6.621		3.868		-1.712		-0.219		1
			D, Block2		-6.749		2.394		-2.819		-0.223		1
			N, Block3		11.884		7.307		1.626		0.394		1
			O, Block3		-14.297		4.713		-3.033		-0.473		1
			D, Block3		-15.607		4.418		-3.532		-0.517		0.364
			N, Post-test		18.87		7.149		2.639		0.625		1
			O, Post-test		-2.334		5.639		-0.414		-0.077		1
			D, Post-test		-3.375		4.583		-0.736		-0.112		1
			N, Post-removal		23.158		8.257		2.805		0.767		1
			O, Post-removal		3.141		6.786		0.463		0.104		1
			D, Post-removal		8.612		5.823		1.479		0.285		1
	N, Block2		O, Block2		-22.793		4.216		-5.407		-0.755		0.006	**
			D, Block2		-22.921		7.587		-3.021		-0.759		1
			N, Block3		-4.288		2.05		-2.092		-0.142		1
			O, Block3		-30.469		5.234		-5.821		-1.009		0.002	**
			D, Block3		-31.779		9.206		-3.452		-1.052		0.435
			N, Post-test		2.698		2.43		1.111		0.089		1
			O, Post-test		-18.506		5.421		-3.414		-0.613		0.474
			D, Post-test		-19.547		8.262		-2.366		-0.647		1
			N, Post-removal		6.986		3.058		2.284		0.231		1
			O, Post-removal		-13.031		3.835		-3.398		-0.432		0.491
			D, Post-removal		-7.56		5.275		-1.433		-0.25		1
	O, Block2		D, Block2		-0.128		4.616		-0.028		-0.004		1
			N, Block3		18.505		4.604		4.02		0.613		0.123
			O, Block3		-7.676		2.141		-3.585		-0.254		0.324
			D, Block3		-8.986		5.827		-1.542		-0.298		1
			N, Post-test		25.491		4.363		5.842		0.844		0.002	**
			O, Post-test		4.288		3.624		1.183		0.142		1
			D, Post-test		3.247		5.152		0.63		0.108		1
			N, Post-removal		29.78		5.846		5.094		0.986		0.012	*
			O, Post-removal		9.762		4.378		2.23		0.323		1
			D, Post-removal		15.233		4.534		3.36		0.504		0.534
	D, Block2		N, Block3		18.633		8.047		2.316		0.617		1
			O, Block3		-7.548		5.168		-1.46		-0.25		1
			D, Block3		-8.858		3.55		-2.495		-0.293		1
			N, Post-test		25.619		8.031		3.19		0.848		0.776
			O, Post-test		4.416		6.67		0.662		0.146		1
			D, Post-test		3.375		5.062		0.667		0.112		1
			N, Post-removal		29.907		9.245		3.235		0.99		0.703
			O, Post-removal		9.89		7.805		1.267		0.327		1
			D, Post-removal		15.361		6.799		2.259		0.509		1
	N, Block3		O, Block3		-26.181		5.034		-5.201		-0.867		0.009	**
			D, Block3		-27.491		9.085		-3.026		-0.91		1
			N, Post-test		6.986		2.152		3.247		0.231		0.685
			O, Post-test		-14.217		4.859		-2.926		-0.471		1
			D, Post-test		-15.258		7.829		-1.949		-0.505		1
			N, Post-removal		11.275		2.652		4.251		0.373		0.074
			O, Post-removal		-8.743		3.699		-2.364		-0.29		1
			D, Post-removal		-3.272		5.06		-0.647		-0.108		1
	O, Block3		D, Block3		-1.31		5.24		-0.25		-0.043		1
			N, Post-test		33.167		4.854		6.833		1.098		< .001	***
			O, Post-test		11.963		3.034		3.943		0.396		0.146
			D, Post-test		10.922		4.594		2.378		0.362		1
			N, Post-removal		37.455		6.609		5.667		1.24		0.003	**
			O, Post-removal		17.438		4.682		3.725		0.577		0.237
			D, Post-removal		22.909		5.061		4.527		0.759		0.04	*
	D, Block3		N, Post-test		34.477		9.133		3.775		1.142		0.212
			O, Post-test		13.274		6.84		1.941		0.44		1
			D, Post-test		12.233		3.93		3.113		0.405		0.92
			N, Post-removal		38.766		10.456		3.707		1.284		0.247
			O, Post-removal		18.748		8.491		2.208		0.621		1
			D, Post-removal		24.219		7.329		3.305		0.802		0.603
	N, Post-test		O, Post-test		-21.204		4.119		-5.148		-0.702		0.01	*
			D, Post-test		-22.245		7.46		-2.982		-0.737		1
			N, Post-removal		4.288		2.499		1.716		0.142		1
			O, Post-removal		-15.729		2.837		-5.545		-0.521		0.004	**
			D, Post-removal		-10.258		4.435		-2.313		-0.34		1
	O, Post-test		D, Post-test		-1.041		4.552		-0.229		-0.034		1
			N, Post-removal		25.492		5.943		4.289		0.844		0.068
			O, Post-removal		5.474		4.069		1.345		0.181		1
			D, Post-removal		10.946		4.509		2.428		0.362		1
	D, Post-test		N, Post-removal		26.533		8.743		3.035		0.879		1
			O, Post-removal		6.515		6.57		0.992		0.216		1
			D, Post-removal		11.987		5.243		2.286		0.397		1
	N, Post-removal		O, Post-removal		-20.017		3.465		-5.776		-0.663		0.003	**
			D, Post-removal		-14.546		4.644		-3.133		-0.482		0.88
	O, Post-removal		D, Post-removal		5.471		2.815		1.944		0.181		1
	* p < .05, ** p < .01, *** p < .001
	Note. P-value adjusted for comparing a family of 153
	Note. Results are averaged over the levels of: group, movement speed
	Respiration rate
	Post Hoc Tests
	Post Hoc Comparisons - exposure duration
					Mean Difference		SE		t		Cohen's d		pbonf
	Pre-test		Block1		0.719		0.24		2.992		0.571		0.078
			Block2		0.945		0.248		3.817		0.75		0.013	*
			Block3		1.007		0.28		3.6		0.8		0.02	*
			Post-test		0.306		0.197		1.552		0.243		1
	Block1		Block2		0.225		0.109		2.077		0.179		0.524
			Block3		0.287		0.136		2.117		0.228		0.485
			Post-test		-0.414		0.231		-1.79		-0.329		0.903
	Block2		Block3		0.062		0.135		0.46		0.049		1
			Post-test		-0.639		0.215		-2.971		-0.508		0.082
	Block3		Post-test		-0.701		0.206		-3.409		-0.557		0.031	*
	* p < .05, ***, p < .001
	Note. P-value adjusted for comparing a family of 10
	Note. Results are averaged over the levels of: group,movement speed
	LF/HF ratio
	Post Hoc Tests
	Post Hoc Comparisons - movement speed
					Mean Difference		SE		t		Cohen's d		pbonf
	Slow		Fast		0.178		0.073		2.431		0.276		0.026	*
	* p < .05, ***, p < .001
	Note. Results are averaged over the levels of : group, exposure duration
	Post Hoc Comparisons - movement speed * exposure duration * group
					Mean Difference		SE		t		Cohen's d		pbonf
	group1, Slow, Pre-test		group2, Slow, Pre-test		-0.588		0.29		-2.028		-0.911		1
			group1, Fast, Pre-test		0.011		0.179		0.062		0.017		1
			group2, Fast, Pre-test		-0.104		0.29		-0.359		-0.162		1
			group1, Slow, Block1		-0.108		0.203		-0.534		-0.168		1
			group2, Slow, Block1		-0.29		0.29		-1.001		-0.45		1
			group1, Fast, Block1		-0.109		0.219		-0.499		-0.169		1
			group2, Fast, Block1		-0.227		0.29		-0.784		-0.352		1
			group1, Slow, Block2		-0.261		0.203		-1.287		-0.405		1
			group2, Slow, Block2		-0.547		0.29		-1.887		-0.848		1
			group1, Fast, Block2		-0.134		0.219		-0.612		-0.208		1
			group2, Fast, Block2		-0.236		0.29		-0.812		-0.365		1
			group1, Slow, Block3		-0.297		0.203		-1.463		-0.46		1
			group2, Slow, Block3		-0.318		0.29		-1.095		-0.492		1
			group1, Fast, Block3		-0.023		0.219		-0.104		-0.035		1
			group2, Fast, Block3		-0.273		0.29		-0.94		-0.423		1
			group1, Slow, Post-test		-0.844		0.203		-4.158		-1.308		0.011	*
			group2, Slow, Post-test		-0.382		0.29		-1.316		-0.591		1
			group1, Fast, Post-test		-0.295		0.219		-1.349		-0.458		1
			group2, Fast, Post-test		-0.465		0.29		-1.605		-0.721		1
	group2, Slow, Pre-test		group1, Fast, Pre-test		0.599		0.29		2.066		0.929		1
			group2, Fast, Pre-test		0.484		0.162		2.99		0.75		0.713
			group1, Slow, Block1		0.48		0.29		1.654		0.743		1
			group2, Slow, Block1		0.298		0.184		1.623		0.462		1
			group1, Fast, Block1		0.479		0.29		1.651		0.742		1
			group2, Fast, Block1		0.361		0.198		1.823		0.559		1
			group1, Slow, Block2		0.327		0.29		1.128		0.507		1
			group2, Slow, Block2		0.041		0.184		0.223		0.064		1
			group1, Fast, Block2		0.454		0.29		1.566		0.704		1
			group2, Fast, Block2		0.353		0.198		1.781		0.547		1
			group1, Slow, Block3		0.291		0.29		1.004		0.451		1
			group2, Slow, Block3		0.27		0.184		1.473		0.419		1
			group1, Fast, Block3		0.565		0.29		1.949		0.876		1
			group2, Fast, Block3		0.316		0.198		1.593		0.489		1
			group1, Slow, Post-test		-0.256		0.29		-0.881		-0.396		1
			group2, Slow, Post-test		0.207		0.184		1.125		0.32		1
			group1, Fast, Post-test		0.293		0.29		1.01		0.454		1
			group2, Fast, Post-test		0.123		0.198		0.62		0.19		1
	group1, Fast, Pre-test		group2, Fast, Pre-test		-0.115		0.29		-0.397		-0.179		1
			group1, Slow, Block1		-0.119		0.219		-0.546		-0.185		1
			group2, Slow, Block1		-0.301		0.29		-1.039		-0.467		1
			group1, Fast, Block1		-0.12		0.203		-0.593		-0.186		1
			group2, Fast, Block1		-0.238		0.29		-0.822		-0.369		1
			group1, Slow, Block2		-0.272		0.219		-1.243		-0.422		1
			group2, Slow, Block2		-0.558		0.29		-1.925		-0.865		1
			group1, Fast, Block2		-0.145		0.203		-0.715		-0.225		1
			group2, Fast, Block2		-0.247		0.29		-0.85		-0.382		1
			group1, Slow, Block3		-0.308		0.219		-1.407		-0.477		1
			group2, Slow, Block3		-0.329		0.29		-1.133		-0.509		1
			group1, Fast, Block3		-0.034		0.203		-0.167		-0.053		1
			group2, Fast, Block3		-0.284		0.29		-0.978		-0.44		1
			group1, Slow, Post-test		-0.855		0.219		-3.905		-1.325		0.03	*
			group2, Slow, Post-test		-0.393		0.29		-1.354		-0.608		1
			group1, Fast, Post-test		-0.306		0.203		-1.509		-0.475		1
			group2, Fast, Post-test		-0.476		0.29		-1.643		-0.738		1
	group2, Fast, Pre-test		group1, Slow, Block1		-0.004		0.29		-0.014		-0.006		1
			group2, Slow, Block1		-0.186		0.198		-0.939		-0.288		1
			group1, Fast, Block1		-0.005		0.29		-0.017		-0.008		1
			group2, Fast, Block1		-0.123		0.184		-0.67		-0.191		1
			group1, Slow, Block2		-0.157		0.29		-0.541		-0.243		1
			group2, Slow, Block2		-0.443		0.198		-2.237		-0.686		1
			group1, Fast, Block2		-0.03		0.29		-0.103		-0.046		1
			group2, Fast, Block2		-0.131		0.184		-0.715		-0.203		1
			group1, Slow, Block3		-0.193		0.29		-0.665		-0.299		1
			group2, Slow, Block3		-0.213		0.198		-1.078		-0.331		1
			group1, Fast, Block3		0.081		0.29		0.281		0.126		1
			group2, Fast, Block3		-0.168		0.184		-0.918		-0.261		1
			group1, Slow, Post-test		-0.74		0.29		-2.55		-1.146		1
			group2, Slow, Post-test		-0.277		0.198		-1.401		-0.43		1
			group1, Fast, Post-test		-0.191		0.29		-0.659		-0.296		1
			group2, Fast, Post-test		-0.361		0.184		-1.967		-0.56		1
	group1, Slow, Block1		group2, Slow, Block1		-0.182		0.29		-0.627		-0.282		1
			group1, Fast, Block1		-94.09		0.179		-0.005		-0.001		1
			group2, Fast, Block1		-0.119		0.29		-0.41		-0.184		1
			group1, Slow, Block2		-0.153		0.203		-0.752		-0.237		1
			group2, Slow, Block2		-0.439		0.29		-1.513		-0.68		1
			group1, Fast, Block2		-0.026		0.219		-0.117		-0.04		1
			group2, Fast, Block2		-0.127		0.29		-0.438		-0.197		1
			group1, Slow, Block3		-0.189		0.203		-0.929		-0.292		1
			group2, Slow, Block3		-0.209		0.29		-0.722		-0.324		1
			group1, Fast, Block3		0.086		0.219		0.391		0.133		1
			group2, Fast, Block3		-0.164		0.29		-0.566		-0.255		1
			group1, Slow, Post-test		-0.735		0.203		-3.624		-1.14		0.08
			group2, Slow, Post-test		-0.273		0.29		-0.942		-0.423		1
			group1, Fast, Post-test		-0.187		0.219		-0.854		-0.29		1
			group2, Fast, Post-test		-0.357		0.29		-1.231		-0.553		1
	group2, Slow, Block1		group1, Fast, Block1		0.181		0.29		0.624		0.28		1
			group2, Fast, Block1		0.063		0.162		0.389		0.098		1
			group1, Slow, Block2		0.029		0.29		0.1		0.045		1
			group2, Slow, Block2		-0.257		0.184		-1.399		-0.398		1
			group1, Fast, Block2		0.156		0.29		0.539		0.242		1
			group2, Fast, Block2		0.055		0.198		0.276		0.085		1
			group1, Slow, Block3		-0.007		0.29		-0.023		-0.01		1
			group2, Slow, Block3		-0.027		0.184		-0.149		-0.043		1
			group1, Fast, Block3		0.267		0.29		0.922		0.414		1
			group2, Fast, Block3		0.018		0.198		0.089		0.027		1
			group1, Slow, Post-test		-0.554		0.29		-1.909		-0.858		1
			group2, Slow, Post-test		-0.091		0.184		-0.497		-0.142		1
			group1, Fast, Post-test		-0.005		0.29		-0.017		-0.008		1
			group2, Fast, Post-test		-0.175		0.198		-0.884		-0.271		1
	group1, Fast, Block1		group2, Fast, Block1		-0.118		0.29		-0.407		-0.183		1
			group1, Slow, Block2		-0.152		0.219		-0.693		-0.235		1
			group2, Slow, Block2		-0.438		0.29		-1.51		-0.679		1
			group1, Fast, Block2		-0.025		0.203		-0.122		-0.038		1
			group2, Fast, Block2		-0.126		0.29		-0.435		-0.196		1
			group1, Slow, Block3		-0.188		0.219		-0.857		-0.291		1
			group2, Slow, Block3		-0.208		0.29		-0.719		-0.323		1
			group1, Fast, Block3		0.086		0.203		0.426		0.134		1
			group2, Fast, Block3		-0.163		0.29		-0.563		-0.253		1
			group1, Slow, Post-test		-0.735		0.219		-3.355		-1.138		0.204
			group2, Slow, Post-test		-0.272		0.29		-0.939		-0.422		1
			group1, Fast, Post-test		-0.186		0.203		-0.916		-0.288		1
			group2, Fast, Post-test		-0.356		0.29		-1.228		-0.552		1
	group2, Fast, Block1		group1, Slow, Block2		-0.034		0.29		-0.117		-0.052		1
			group2, Slow, Block2		-0.32		0.198		-1.616		-0.496		1
			group1, Fast, Block2		0.093		0.29		0.322		0.145		1
			group2, Fast, Block2		-0.008		0.184		-0.045		-0.013		1
			group1, Slow, Block3		-0.07		0.29		-0.24		-0.108		1
			group2, Slow, Block3		-0.09		0.198		-0.457		-0.14		1
			group1, Fast, Block3		0.204		0.29		0.705		0.317		1
			group2, Fast, Block3		-0.045		0.184		-0.247		-0.07		1
			group1, Slow, Post-test		-0.617		0.29		-2.126		-0.956		1
			group2, Slow, Post-test		-0.154		0.198		-0.779		-0.239		1
			group1, Fast, Post-test		-0.068		0.29		-0.235		-0.105		1
			group2, Fast, Post-test		-0.238		0.184		-1.297		-0.369		1
	group1, Slow, Block2		group2, Slow, Block2		-0.286		0.29		-0.986		-0.443		1
			group1, Fast, Block2		0.127		0.179		0.711		0.197		1
			group2, Fast, Block2		0.026		0.29		0.088		0.04		1
			group1, Slow, Block3		-0.036		0.203		-0.177		-0.056		1
			group2, Slow, Block3		-0.057		0.29		-0.195		-0.088		1
			group1, Fast, Block3		0.238		0.219		1.088		0.369		1
			group2, Fast, Block3		-0.012		0.29		-0.04		-0.018		1
			group1, Slow, Post-test		-0.583		0.203		-2.871		-0.903		0.913
			group2, Slow, Post-test		-0.12		0.29		-0.415		-0.187		1
			group1, Fast, Post-test		-0.034		0.219		-0.156		-0.053		1
			group2, Fast, Post-test		-0.204		0.29		-0.704		-0.317		1
	group2, Slow, Block2		group1, Fast, Block2		0.413		0.29		1.425		0.64		1
			group2, Fast, Block2		0.312		0.162		1.926		0.483		1
			group1, Slow, Block3		0.25		0.29		0.863		0.388		1
			group2, Slow, Block3		0.229		0.184		1.25		0.356		1
			group1, Fast, Block3		0.524		0.29		1.808		0.813		1
			group2, Fast, Block3		0.275		0.198		1.386		0.425		1
			group1, Slow, Post-test		-0.297		0.29		-1.023		-0.46		1
			group2, Slow, Post-test		0.166		0.184		0.902		0.257		1
			group1, Fast, Post-test		0.252		0.29		0.868		0.39		1
			group2, Fast, Post-test		0.082		0.198		0.413		0.127		1
	group1, Fast, Block2		group2, Fast, Block2		-0.102		0.29		-0.35		-0.157		1
			group1, Slow, Block3		-0.163		0.219		-0.745		-0.253		1
			group2, Slow, Block3		-0.184		0.29		-0.633		-0.285		1
			group1, Fast, Block3		0.111		0.203		0.547		0.172		1
			group2, Fast, Block3		-0.139		0.29		-0.478		-0.215		1
			group1, Slow, Post-test		-0.71		0.219		-3.242		-1.1		0.294
			group2, Slow, Post-test		-0.248		0.29		-0.854		-0.384		1
			group1, Fast, Post-test		-0.161		0.203		-0.795		-0.25		1
			group2, Fast, Post-test		-0.331		0.29		-1.143		-0.514		1
	group2, Fast, Block2		group1, Slow, Block3		-0.061		0.29		-0.212		-0.095		1
			group2, Slow, Block3		-0.082		0.198		-0.415		-0.127		1
			group1, Fast, Block3		0.213		0.29		0.733		0.33		1
			group2, Fast, Block3		-0.037		0.184		-0.202		-0.058		1
			group1, Slow, Post-test		-0.608		0.29		-2.097		-0.943		1
			group2, Slow, Post-test		-0.146		0.198		-0.738		-0.226		1
			group1, Fast, Post-test		-0.06		0.29		-0.206		-0.093		1
			group2, Fast, Post-test		-0.23		0.184		-1.252		-0.356		1
	group1, Slow, Block3		group2, Slow, Block3		-0.021		0.29		-0.071		-0.032		1
			group1, Fast, Block3		0.274		0.179		1.532		0.425		1
			group2, Fast, Block3		0.024		0.29		0.084		0.038		1
			group1, Slow, Post-test		-0.547		0.203		-2.694		-0.847		1
			group2, Slow, Post-test		-0.085		0.29		-0.292		-0.131		1
			group1, Fast, Post-test		0.002		0.219		0.008		0.003		1
			group2, Fast, Post-test		-0.168		0.29		-0.581		-0.261		1
	group2, Slow, Block3		group1, Fast, Block3		0.295		0.29		1.017		0.457		1
			group2, Fast, Block3		0.045		0.162		0.278		0.07		1
			group1, Slow, Post-test		-0.526		0.29		-1.814		-0.815		1
			group2, Slow, Post-test		-0.064		0.184		-0.348		-0.099		1
			group1, Fast, Post-test		0.022		0.29		0.077		0.035		1
			group2, Fast, Post-test		-0.148		0.198		-0.746		-0.229		1
	group1, Fast, Block3		group2, Fast, Block3		-0.25		0.29		-0.861		-0.387		1
			group1, Slow, Post-test		-0.821		0.219		-3.75		-1.272		0.053
			group2, Slow, Post-test		-0.359		0.29		-1.237		-0.556		1
			group1, Fast, Post-test		-0.272		0.203		-1.342		-0.422		1
			group2, Fast, Post-test		-0.443		0.29		-1.526		-0.686		1
	group2, Fast, Block3		group1, Slow, Post-test		-0.571		0.29		-1.969		-0.885		1
			group2, Slow, Post-test		-0.109		0.198		-0.55		-0.169		1
			group1, Fast, Post-test		-0.023		0.29		-0.078		-0.035		1
			group2, Fast, Post-test		-0.193		0.184		-1.05		-0.299		1
	group1, Slow, Post-test		group2, Slow, Post-test		0.462		0.29		1.594		0.716		1
			group1, Fast, Post-test		0.549		0.179		3.066		0.85		0.57
			group2, Fast, Post-test		0.378		0.29		1.305		0.586		1
	group2, Slow, Post-test		group1, Fast, Post-test		0.086		0.29		0.298		0.134		1
			group2, Fast, Post-test		-0.084		0.162		-0.518		-0.13		1
	group1, Fast, Post-test		group2, Fast, Post-test		-0.17		0.29		-0.586		-0.264		1
	* p < .05, ***, p < .001
	Note. P-value adjusted for comparing a family of 190
